# Supplementary material for: Synergic Effect of Adsorption and Biodegradation by Microsphere Immobilizing Bacillus velezensis for Enhanced Removal Organics in Slaughter Wastewater
Source: MDPI journal article supplement (doi:10.3390/pr9071145), 2021-06-30
Supplement: s1 [file s1]

Archive with 1 entries (1 files):
- processes-1253594-supplementary.pdf
