# Supplementary material for: Synergic Effect of Adsorption and Biodegradation by Microsphere Immobilizing Bacillus velezensis for Enhanced Removal Organics in Slaughter Wastewater
Source: MDPI journal article supplement (doi:10.3390/pr9071145), 2021-06-30
Supplement: s1 [file s1 › processes-1253594-supplementary.pdf]

# Supplementary Materials: Synergic effect of adsorption and biodegradation enhance organic removal by immobilized *Bacillus velezensis* for slaughter wastewater

Jing Deng, Qi Jue Chen, Bo Yong Hu, Wen Li\*, Ming Xi Jia, Yi Shi, Shou Yao Xiong, Jie Bai and Hua Qun Yin

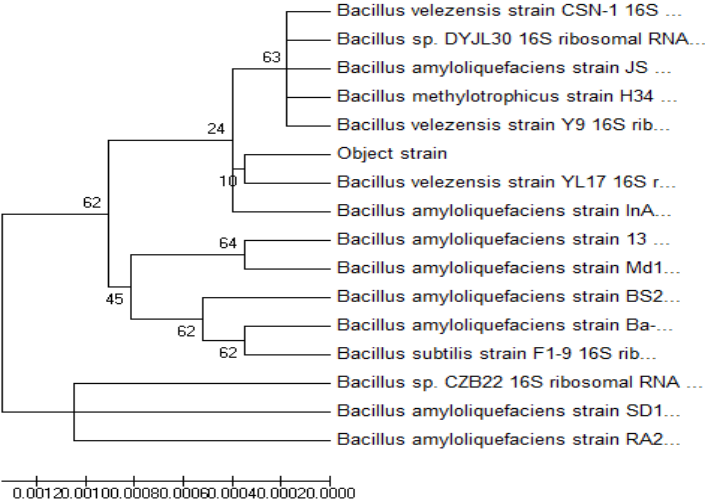

**Fig. S1.** Neighbor-joining phylogenetic tree constructed from 16S rDNA gene sequence

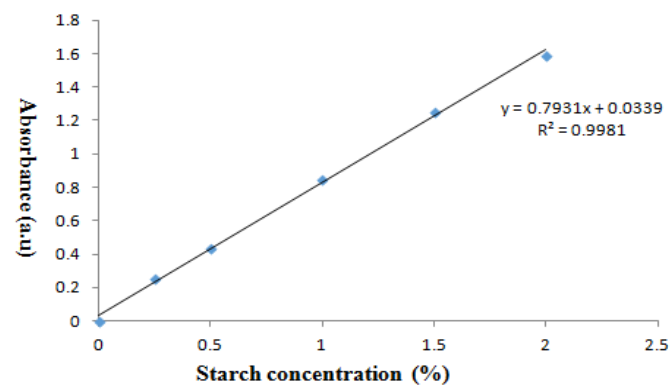

**Fig. S2.** Starch concentration standard curve.

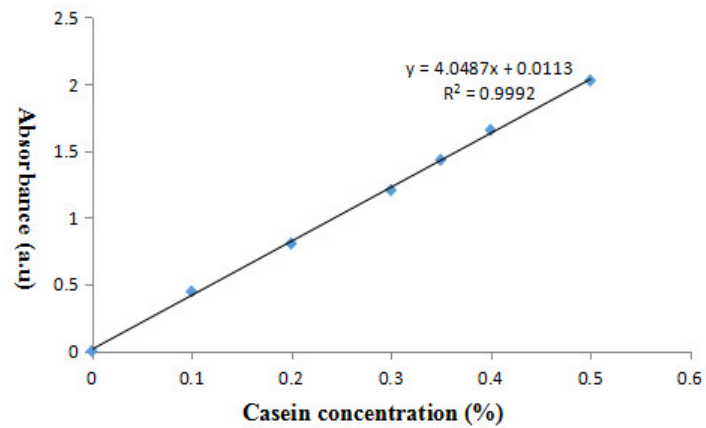

**Fig. S3.** Protein concentration standard curve.

**Table S1.**Effect of PVA concentration on microsphere molding

| PVA concentration | Microspheres form                                        |
|-------------------|----------------------------------------------------------|
| 6 %               | Uniform size, round, drying shrinkage after crosslinking |
| 8 %               | Uniform size, round, drying shrinkage after crosslinking |
| 10 %              | Uniform size, round, dry form after crosslinking intact  |
| 12 %              | There are some smearing, irregular shape                 |
| 14 %              | Severe tailing, as the ball difficulty                   |
